# Supplementary material for: mfapy: An open-source Python package for 13C-based metabolic flux analysis
Source: PubMed Central journal article supplement (PMC8322459; doi:10.1016/j.mec.2021.e00177), 2021-07-17
Supplement: mmc1.pdf [file mmc1.pdf]

## **Supplementary Information**

**mfapy:** An open-source Python package for  $^{13}\text{C}$ -based metabolic flux analysis

Fumio Matsuda, Kohsuke Maeda, Takeo Taniguchi, Yuya Kondo, Futa Yatabe, Nobuyuki Okahashi, and Hiroshi Shimizu

**Supplementary Figure 1** Example python script for  $^{13}\text{C}$ -MFA of toy model using mfapy.

**Supplementary Figure 2** Toy model of TCA cycle obtained from original article of EMU algorithm.

**Supplementary Figure 3** Metabolic model for  $^{13}\text{C}$ -MFA of metabolically engineered *E. coli* considering G-value parameter.

**Supplementary Figure 4** Functional test of mfapy

**Supplementary Table 1** Model definition file of toy model

(Example\_1\_toymodel\_model.txt)

**Supplementary Table 2** Calculation of mass isotope distribution vector (MDV) of glutamate by elementary metabolite unit (EMU) framework.

**Supplementary Table 3** Comparison of results of  $^{13}\text{C}$ -metabolic flux analysis of metabolically engineered *E. coli*.

**Supplementary Table 4** Comparison between observed MDVs of glycine and phenylalanine; simulated MDVs of global and local optimums of  $^{13}\text{C}$ -metabolic flux analysis of metabolically engineered *E. coli*.

**Supplementary Figure 1** Example python script for  $^{13}\text{C}$ -MFA of toy model using mfapy. Python codes for parallel labeling experiment are shown. (a) Following the import of mfapy package, (b) a metabolic model (model) is constructed from a model definition file using information regarding a metabolic network (reactions), reversible reactions (reversible), all metabolites in the metabolic network (“metabolites”), and the fragment of target metabolites whose labeling patterns are observed using mass spectrometry (“fragments”). Experimental conditions were configured by (c) addition of constraints to metabolic flux vector, (d) preparation of two  $^{13}\text{C}$ -labeled carbon sources, and (e) loading two MDV datasets for parallel labeling experiment. (f) Metabolic flux distribution was estimated by setting experiments, generating random initial flux vectors, and non-linear optimization. (g) Lower and upper boundaries of 95% confidence interval of v3 were estimated as an example.

```

#-----
# Name:          mfapy Example_1_toymodel.py Example code of mfapy
#-----
import mfapy (a)
# Model construction
reactions, reversible, metabolites, fragments¥
= mfapy.mfapyio.load_metabolic_model("example_1_toymodel_model.txt") (b)
model = mfapy.metabolicmodel.MetabolicModel(reactions, reversible,¥
metabolites, fragments)
# Addition of constraints
state = model.load_states("Example_1_toymodel_status.csv", format = 'csv') (c)
model.set_constraints_from_state_dict(state)
model.update()
# Generation of CarbonSource instance
cs1 = model.generate_carbon_source_template()
cs1.set_each_isotopomer('AcCoA', {'#10':0.5}) (d)
cs2 = model.generate_carbon_source_template()
cs2.set_each_isotopomer('AcCoA', {'#11':0.5})
# Load MDV data
mdv1 = model.load_mdv_data("Example_1_MDV1.txt") (e)
mdv2 = model.load_mdv_data("Example_1_MDV2.txt")
# Flux estimation Step 1: Setting experiments
model.set_experiment('ex1', mdv1, cs1) (f)
model.set_experiment('ex2', mdv2, cs2)
# Flux estimation step 2: Generation of intical flux vectors
endstate, flux = model.generate_initial_states(50, 4, method = "parallel") (g)
# Flux estimation step 3: Fitting model
for method in ["GN_CRS2_LM", "LN_PRAXIS", "SLSQP"]:
    endstate, RSS, flux = model.fitting_flux(method = method, flux = flux) (h)
model.show_results(("final", flux[0])) # Show result
# Estimation of 95% CI
ci_edge = model.generate_ci_template(targets = [('reaction', "v3")])
ci = model.search_ci(ci_edge, flux[0], method = 'grid') (i)
lb = ci['data'][('reaction', "v3")]['lower_boundary']
ub = ci['data'][('reaction', "v3")]['upper_boundary']
print("v3", "Lower bondary:", lb, "Upper boundary:", ub)

```

**Supplementary Figure 2** Toy model of TCA cycle obtained from original article of EMU algorithm (Antoniewicz et al., 2007)

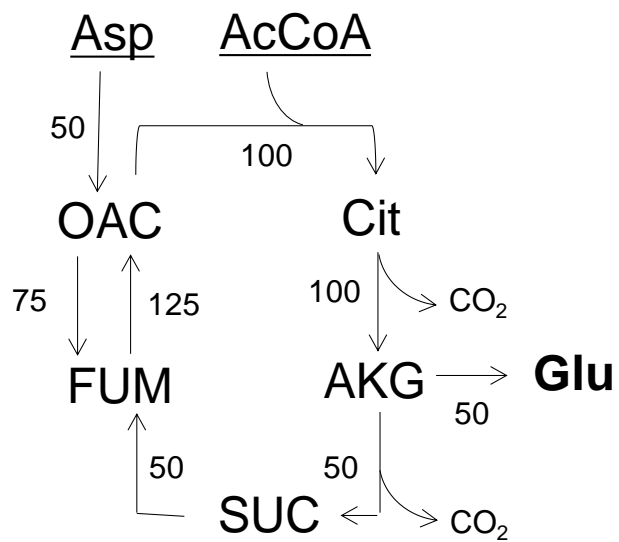

**Supplementary Figure 3** Metabolic model for  $^{13}\text{C}$ -MFA of metabolically engineered *E. coli* considering G-value parameter (extracted). Complete metabolic model is available as “Example\_2\_Ecoli\_model.txt” from mfapy web page (<https://github.com/fumiomatsuda/mfapy>). G-value parameter is used to rectify effects of inoculated unlabeled proteinogenic amino acids (such as Ala in the network) on observed MDV. Hence, metabolic reaction from Pyr to Ala ( $r_{58}$ ) was set as “pseudo.” Because “pseudo”-type reactions were disregarded in constructing a stoichiometry matrix of its substrate, metabolic flux levels of  $r_{58}$  did not affect metabolic flux levels of Pyr-related reactions. However, metabolic flux levels of  $r_{58}$  and atom mapping was considered for its product.  $^{13}\text{C}$ -labeling of Ala yielded was identical to that of Pyr. To represent effects of inoculated unlabeled proteinogenic Ala, the yielded Ala was mixed with non-labeled Ala (SubsAla) and then discarded as Alaex to maintain a metabolic steady state. Ratio between  $r_{58}$  and  $r_{95}$  in optimum flux vector was used to estimate G-value of Ala.

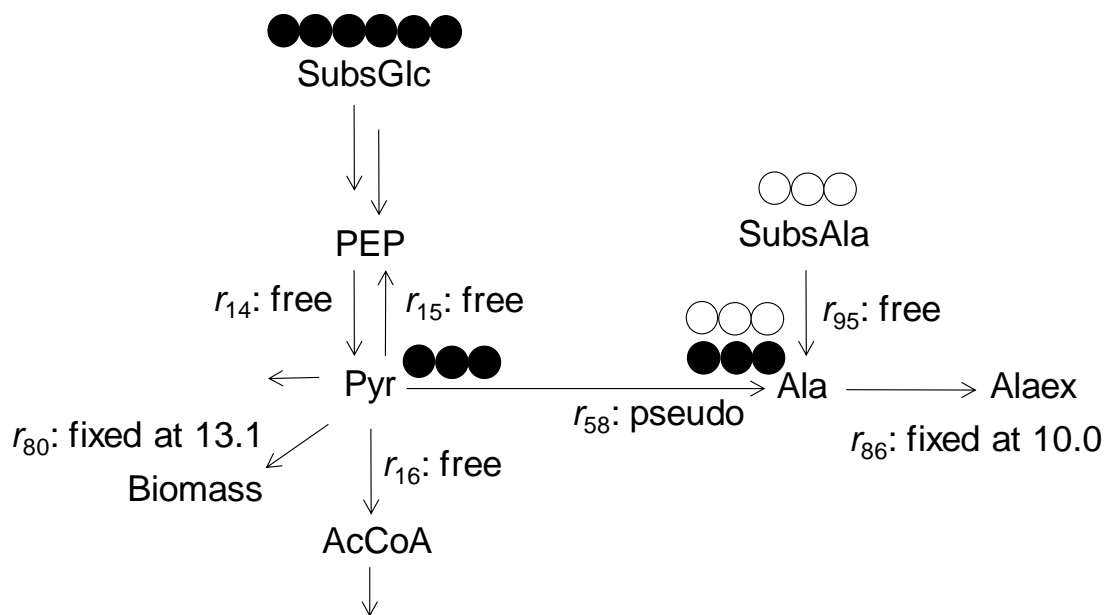

**Supplementary Figure 4** Functional test of mfapy. Comparison of estimated metabolic flux vectors ( $v_{opt}$ ) of  $^{13}\text{C}$ -MFA of metabolically engineered *E. coli* determined using authentic software (OpenMebius) and mfapy. Metabolic models and measurement data were obtained from previous study (Okahashi et al., 2017).

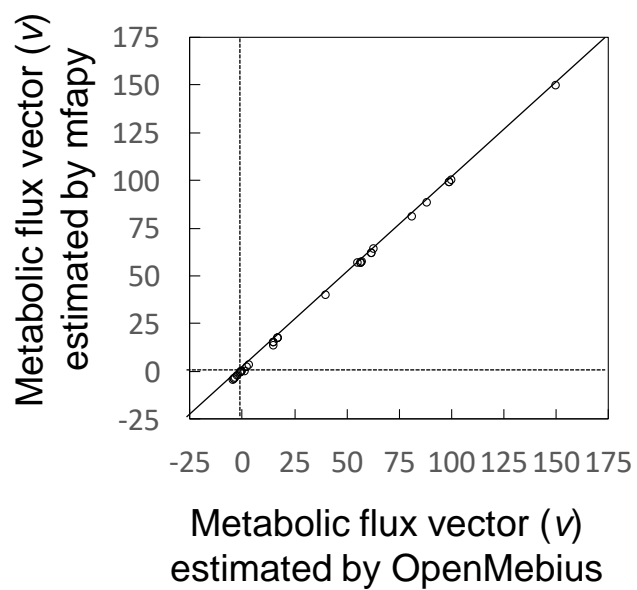

## Supplementary Table 1 Model definition file of toy model

(Example\_1\_toymodel\_model.txt).

```

#
# Toy model for example 1
#
//Reactions
# ID      For stoichiometry  For atom      Atom mapping  External ID
          matrix        mapping
v1        AcCoA + OAC -->  AcCoA + OAC  AB + CDEF --> (kegg:R00351)
          > Cit          --> Cit      > FEDBAC
v2        Cit --> AKG +  Cit --> AKG +  ABCDEF -->     (kegg:R00709)
          CO2ex          CO2ex          ABCDE + F
v3        AKG --> Glu    AKG --> Glu    ABCDE -->     (kegg:R00243)
          ABCDE
v4        AKG --> Suc +  AKG --> Suc +  ABCDE -->     (kegg:R01197)
          CO2ex          CO2ex          BCDE + A
v5        Suc --> Fum    Suc --> Fum    ABCD -->     (kegg:R02164)
          ABCD
v6        Fum --> OAC    Fum --> OAC    ABCD -->     (kegg:R01082)
          ABCD
v7        OAC --> Fum    OAC --> Fum    ABCD -->     (kegg:R01082)
          ABCD
v8        Asp --> OAC    Asp --> OAC    ABCD -->     (kegg:R00355)
          ABCD
v9        Glu --> Gluex  nd             nd             (kegg:R00243)
//Metabolites
# Name    Number of atom  Symmetry      Carbon source  Excreted      External ID
          metabolite
CO2ex    1                no            no             excreted      (kegg:C00011)
AcCoA    2                no            carbonsource  no             (kegg:C00024)
OAC      4                no            no             no             (kegg:C00036)
Cit      6                no            no             no             (kegg:C00158)
AKG      5                no            no             no             (kegg:C00026)
Suc      4                symmetry     no             no             (kegg:C00042)
Fum      4                symmetry     no             no             (kegg:C00122)
Glu      5                no            no             no             (kegg:C00025)
Gluex    5                no            no             excreted      (kegg:C00025)
Asp      4                no            carbonsource  no             (kegg:C00049)
//Reversible_reactions
#Name     Forward reaction  Reverse      External ID
          reaction      reaction
FUM       v6                v7           (kegg:R01082)
//Target_fragments
#Name     Type (gcms and  Corresponding  Usage      Formula
          msms)          metabolite and  (Experimental)
          atoms
GluMes    gcms            Glu_1:2:3:4:5  use        C5H10N2O3
//End

```

**Supplementary Table 2** Calculation of mass isotope distribution vector (MDV) of glutamate by elementary metabolite unit (EMU) framework.

| Mass isotope distribution vector (MDV) | Calculated by mfapy | Theoretical value (Antoniewicz et al 2007) |
|----------------------------------------|---------------------|--------------------------------------------|
| Glutamate m+0                          | 0.3464              | 0.3464                                     |
| Glutamate m+1                          | 0.2695              | 0.2695                                     |
| Glutamate m+2                          | 0.2708              | 0.2708                                     |
| Glutamate m+3                          | 0.0807              | 0.0807                                     |
| Glutamate m+4                          | 0.0286              | 0.0286                                     |
| Glutamate m+5                          | 0.0039              | 0.0039                                     |

**Supplementary Table 3** Comparison of results of <sup>13</sup>C-metabolic flux analysis of metabolically engineered *E. coli*.

| ID    | Stoichiometry                | Determined by mfapy (This study) | Determined by OpenMebius (Okahashi et al 2017) |
|-------|------------------------------|----------------------------------|------------------------------------------------|
| r1    | SubsGlc-->G6P                | 100.0                            | 100                                            |
| PGI   | G6P<->F6P (net)              | 0.0                              | 0                                              |
| PFK   | F6P<->FBP (net)              | -3.7                             | -3.7                                           |
| FBA   | FBP<->DHAP+GAP (net)         | -3.7                             | -3.7                                           |
| TPI   | DHAP<->GAP (net)             | -4.3                             | -4.3                                           |
| GAPDH | GAP<->3PG (net)              | 88.4                             | 88.4                                           |
| PEPH  | 3PG<->PEP (net)              | 81.1                             | 81.2                                           |
| PYK   | PEP<->Pyr (net)              | 64.2                             | 62.9                                           |
| r16   | Pyr-->AcCOA+CO2in            | 149.9                            | 150                                            |
| r17   | AcCOA+Oxa-->IsoCit           | 61.9                             | 61.8                                           |
| r18   | IsoCit-->aKG+CO2in           | 61.9                             | 61.8                                           |
| r19   | aKG-->Suc+CO2in              | 56.8                             | 56.7                                           |
| SDH   | r20<=>r21                    | 56.8                             | 56.7                                           |
| FH    | r22<=>r23                    | 56.8                             | 56.7                                           |
| MDH   | r24<=>r25                    | 56.7                             | 55.4                                           |
| r26   | IsoCit+AcCOA-->Mal+Suc       | 0.0                              | 0                                              |
| PEPK  | PEP+CO2<->Oxa (net)          | 13.6                             | 14.9                                           |
| r42   | Mal-->Pyr+CO2in              | 0.1                              | 1.4                                            |
| r27   | G6P-->m6PG                   | 99.0                             | 99                                             |
| r28   | m6PG-->Ru5P+CO2in            | 0.0                              | 0                                              |
| RPI   | r29<=>r30                    | 3.4                              | 3.4                                            |
| RBE   | r31<=>r32                    | -3.4                             | -3.4                                           |
| TKT1  | r33<=>r34                    | -0.8                             | -0.8                                           |
| TAL   | r35<=>r36                    | -0.8                             | -0.8                                           |
| TKT2  | r37<=>r38                    | -2.5                             | -2.5                                           |
| r39   | m6PG-->Pyr+GAP               | 99.0                             | 99                                             |
| r49   | AcCOA-->Acetate              | 57.1                             | 57.2                                           |
| r50   | Acetate-->Acetateex          | 40.0                             | 40                                             |
| r43   | AcCOA+AcCOA-->AcAcCOA        | 17.1                             | 17.2                                           |
| r44   | AcAcCOA+Acetate-->AcAc+AcCOA | 17.1                             | 17.2                                           |
| r45   | AcAc-->Acetone+CO2in         | 17.1                             | 17.2                                           |
| r46   | Acetone-->IPA                | 15.0                             | 15.1                                           |
| r47   | Acetone-->Acetoneex          | 2.1                              | 2.1                                            |
| r48   | IPA-->IPAex                  | 15.0                             | 15.1                                           |



**Supplementary Table 4** Comparison between observed MDVs of glycine and phenylalanine; simulated MDVs of global and local optimums of <sup>13</sup>C-metabolic flux analysis of metabolically engineered *E. coli*.

| Fragment   | Number of isotopes | observed MDV | Global optimum |                      | Local optimum |                      |
|------------|--------------------|--------------|----------------|----------------------|---------------|----------------------|
|            |                    |              | Simulated MDV  | RSS of Simulated MDV | Simulated MDV | RSS of Simulated MDV |
| Gly[M-57]  | 0                  | 0.634        | 0.636          | 0.22                 | 0.634         | 0.01                 |
| Gly[M-57]  | 1                  | 0.105        | 0.106          | 0.01                 | 0.107         | 0.08                 |
| Gly[M-57]  | 2                  | 0.260        | 0.258          | 0.32                 | 0.259         | 0.13                 |
| Gly[M-85]  | 0                  | 0.720        | 0.718          | 0.32                 | 0.720         | 0.00                 |
| Gly[M-85]  | 1                  | 0.280        | 0.282          | 0.32                 | 0.280         | 0.00                 |
| Phe[M-159] | 0                  | 0.233        | 0.234          | 0.06                 | 0.236         | 0.51                 |
| Phe[M-159] | 1                  | 0.142        | 0.141          | 0.04                 | 0.144         | 0.21                 |
| Phe[M-159] | 2                  | 0.193        | 0.194          | 0.01                 | 0.195         | 0.16                 |
| Phe[M-159] | 3                  | 0.189        | 0.188          | 0.08                 | 0.183         | 1.91                 |
| Phe[M-159] | 4                  | 0.096        | 0.096          | 0.01                 | 0.096         | 0.01                 |
| Phe[M-159] | 5                  | 0.090        | 0.091          | 0.04                 | 0.091         | 0.01                 |
| Phe[M-159] | 6                  | 0.036        | 0.036          | 0.01                 | 0.035         | 0.08                 |
| Phe[M-159] | 7                  | 0.015        | 0.015          | 0.00                 | 0.016         | 0.02                 |
| Phe[M-159] | 8                  | 0.006        | 0.006          | 0.01                 | 0.005         | 0.04                 |
